# Supplementary material
Source: MDPI journal article supplement (https://www.mdpi.com/2571-5135/9/3/16)

a) Chao Richness Estimation for herd

| <i>herd</i> | <i>Count</i> | <i>Average</i> | <i>Median</i> | <i>Standard deviation</i> | <i>Minimum</i> | <i>Maximum</i> | <i>Range</i> | <i>Low quartile</i> | <i>Upper quartile</i> | <i>Interquartile range</i> |
|-------------|--------------|----------------|---------------|---------------------------|----------------|----------------|--------------|---------------------|-----------------------|----------------------------|
| herd 1      | 10           | 442.3          | 445.5         | 110.481                   | 293.0          | 629.0          | 336.0        | 357.0               | 477.0                 | 120.0                      |
| herd 2      | 10           | 501.5          | 492.0         | 173.123                   | 230.0          | 849.0          | 619.0        | 378.0               | 567.0                 | 189.0                      |
| herd 3      | 10           | 630.5          | 713.0         | 226.924                   | 169.0          | 891.0          | 722.0        | 474.0               | 769.0                 | 295.0                      |
| herd 4      | 10           | 491.8          | 481.0         | 98.1708                   | 396.0          | 669.0          | 273.0        | 402.0               | 533.0                 | 131.0                      |
| herd 5      | 10           | 705.6          | 520.0         | 522.303                   | 423.0          | 2132.0         | 1709.0       | 453.0               | 605.0                 | 152.0                      |
| Total       | 50           | 554.34         | 485.5         | 280.828                   | 169.0          | 2132.0         | 1963.0       | 419.0               | 629.0                 | 210.0                      |

Chao richness estimation

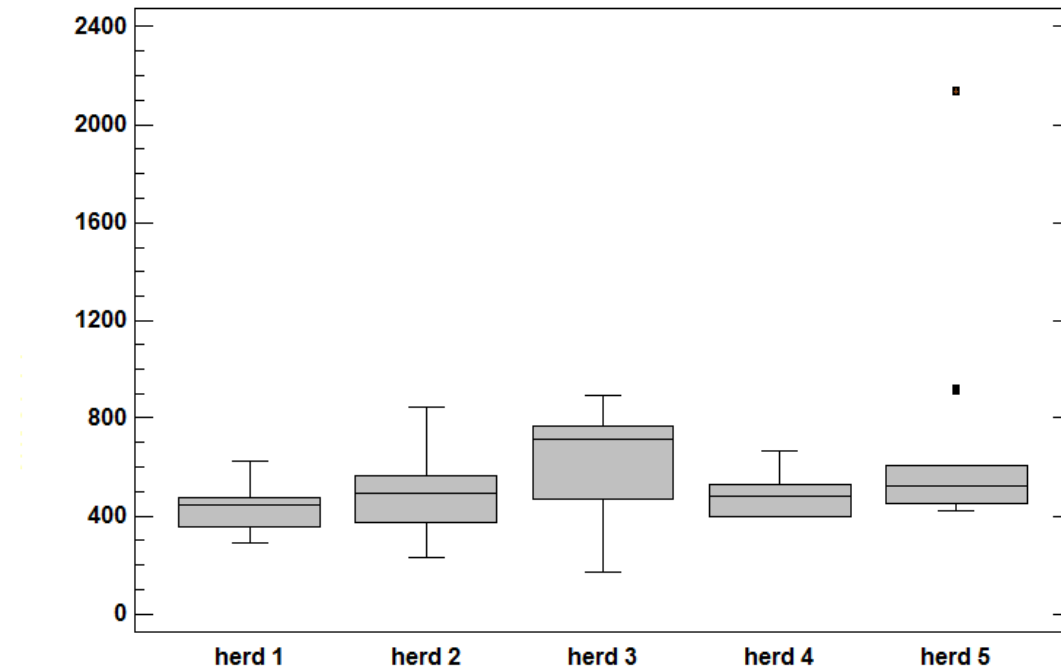

b) Chao Richness Estimation for pregnancy status

| <i>Pregnant status</i> | <i>Count</i> | <i>Average</i> | <i>Median</i> | <i>Standard deviation</i> | <i>Minimum</i> | <i>Maximum</i> | <i>Range</i> | <i>Low quartile</i> | <i>Upper quartile</i> | <i>Interquartile range</i> |
|------------------------|--------------|----------------|---------------|---------------------------|----------------|----------------|--------------|---------------------|-----------------------|----------------------------|
| NON-PREGNANT           | 30           | 584.7          | 516.5         | 339.65                    | 169.0          | 2132.0         | 1963.0       | 419.0               | 657.0                 | 238.0                      |
| PREGNANT               | 20           | 508.8          | 481.0         | 153.851                   | 293.0          | 919.0          | 626.0        | 415.0               | 594.0                 | 179.0                      |
| Total                  | 50           | 554.34         | 485.5         | 280.828                   | 169.0          | 2132.0         | 1963.0       | 419.0               | 629.0                 | 210.0                      |

Chao richness estimation

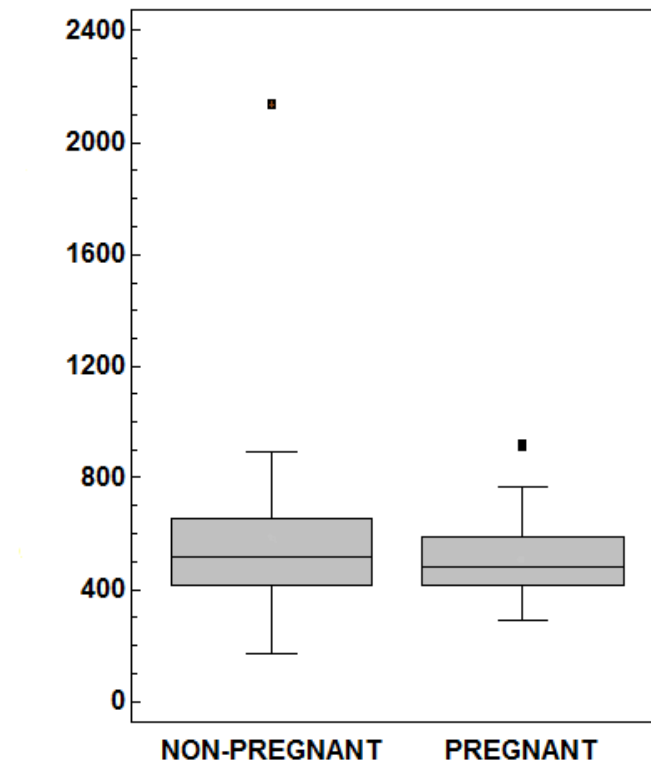

Supplement: s1 [file s1]
