# Supplementary material
Source: MDPI journal article supplement (https://www.mdpi.com/2571-5135/9/3/16)

## EXPERIMENTAL DESIGN

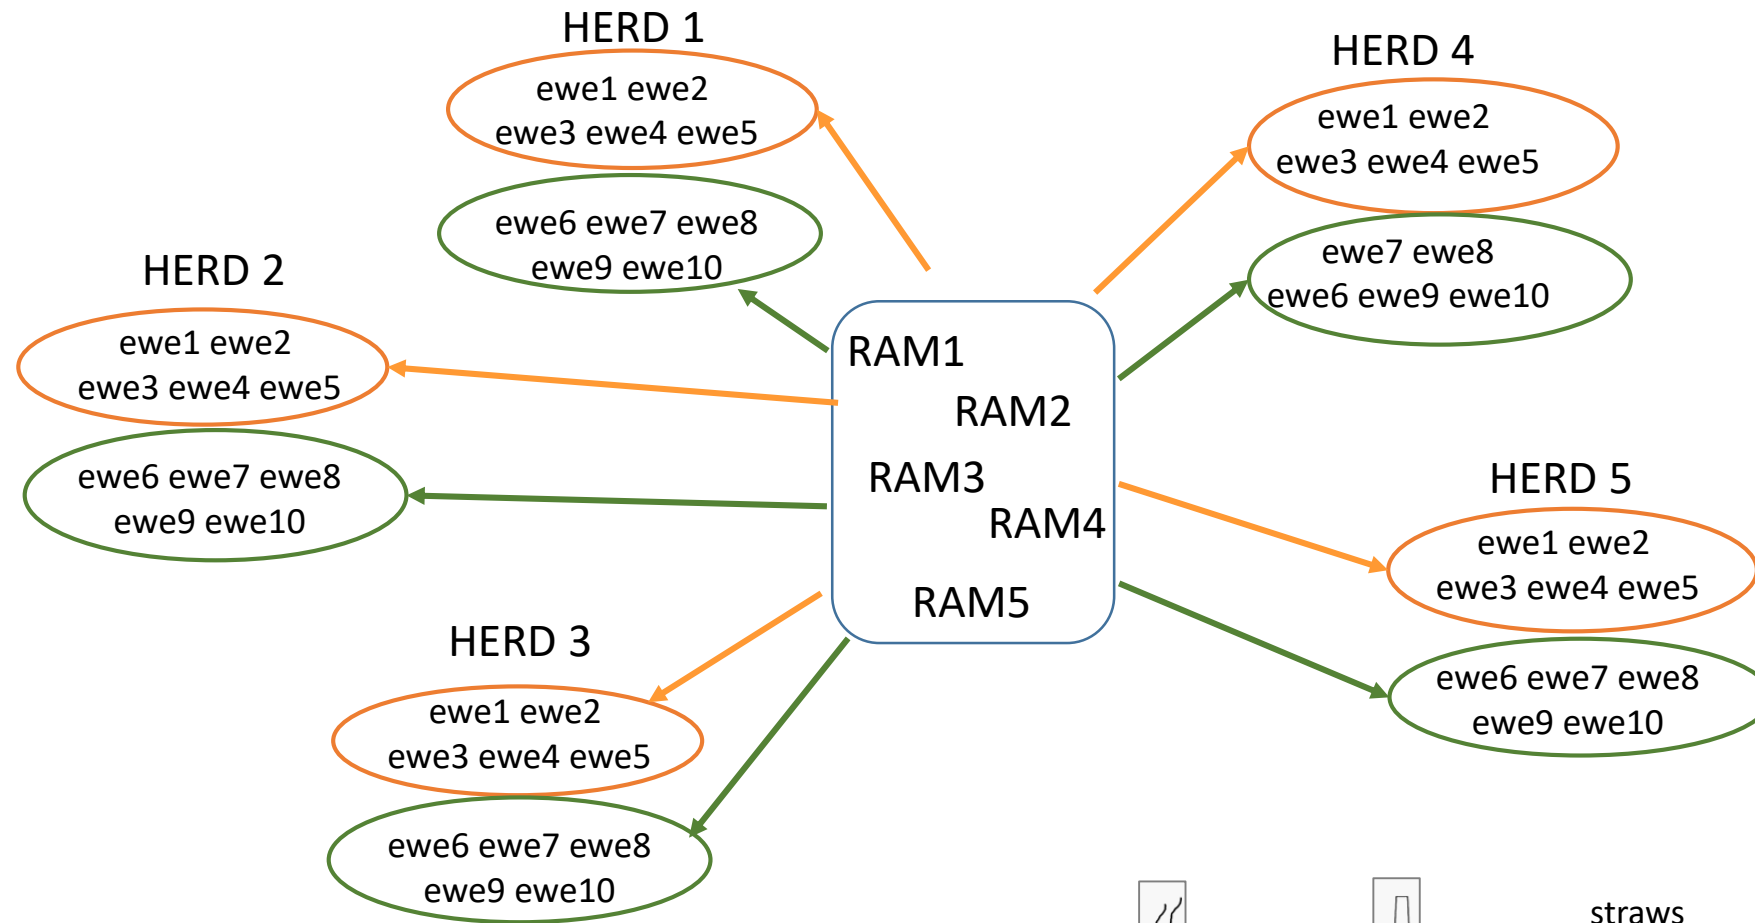

- 5 herds, 10 ewes/herd
- Age 1.5 to 6 years
- At least one lambing

5 ewes/herd PRID<sub>ANTIBIOTIC</sub>  
5 ewes/herd PRID<sub>NON-ANTIBIOTIC</sub>

- 5 AI rams
- Age 4 to 7 years
- Each ram inseminate 10 ewes (2 ewes/herd)
- AIs performed by a single veterinarian in the same day

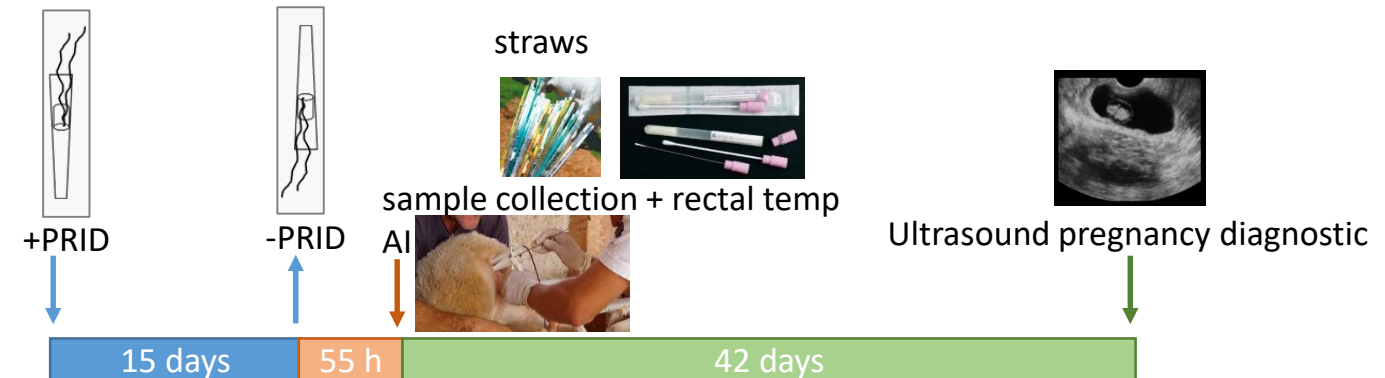

Supplement: s1 [file s1]
