# Supplementary material
Source: MDPI journal article supplement (https://www.mdpi.com/2571-5135/9/3/16)

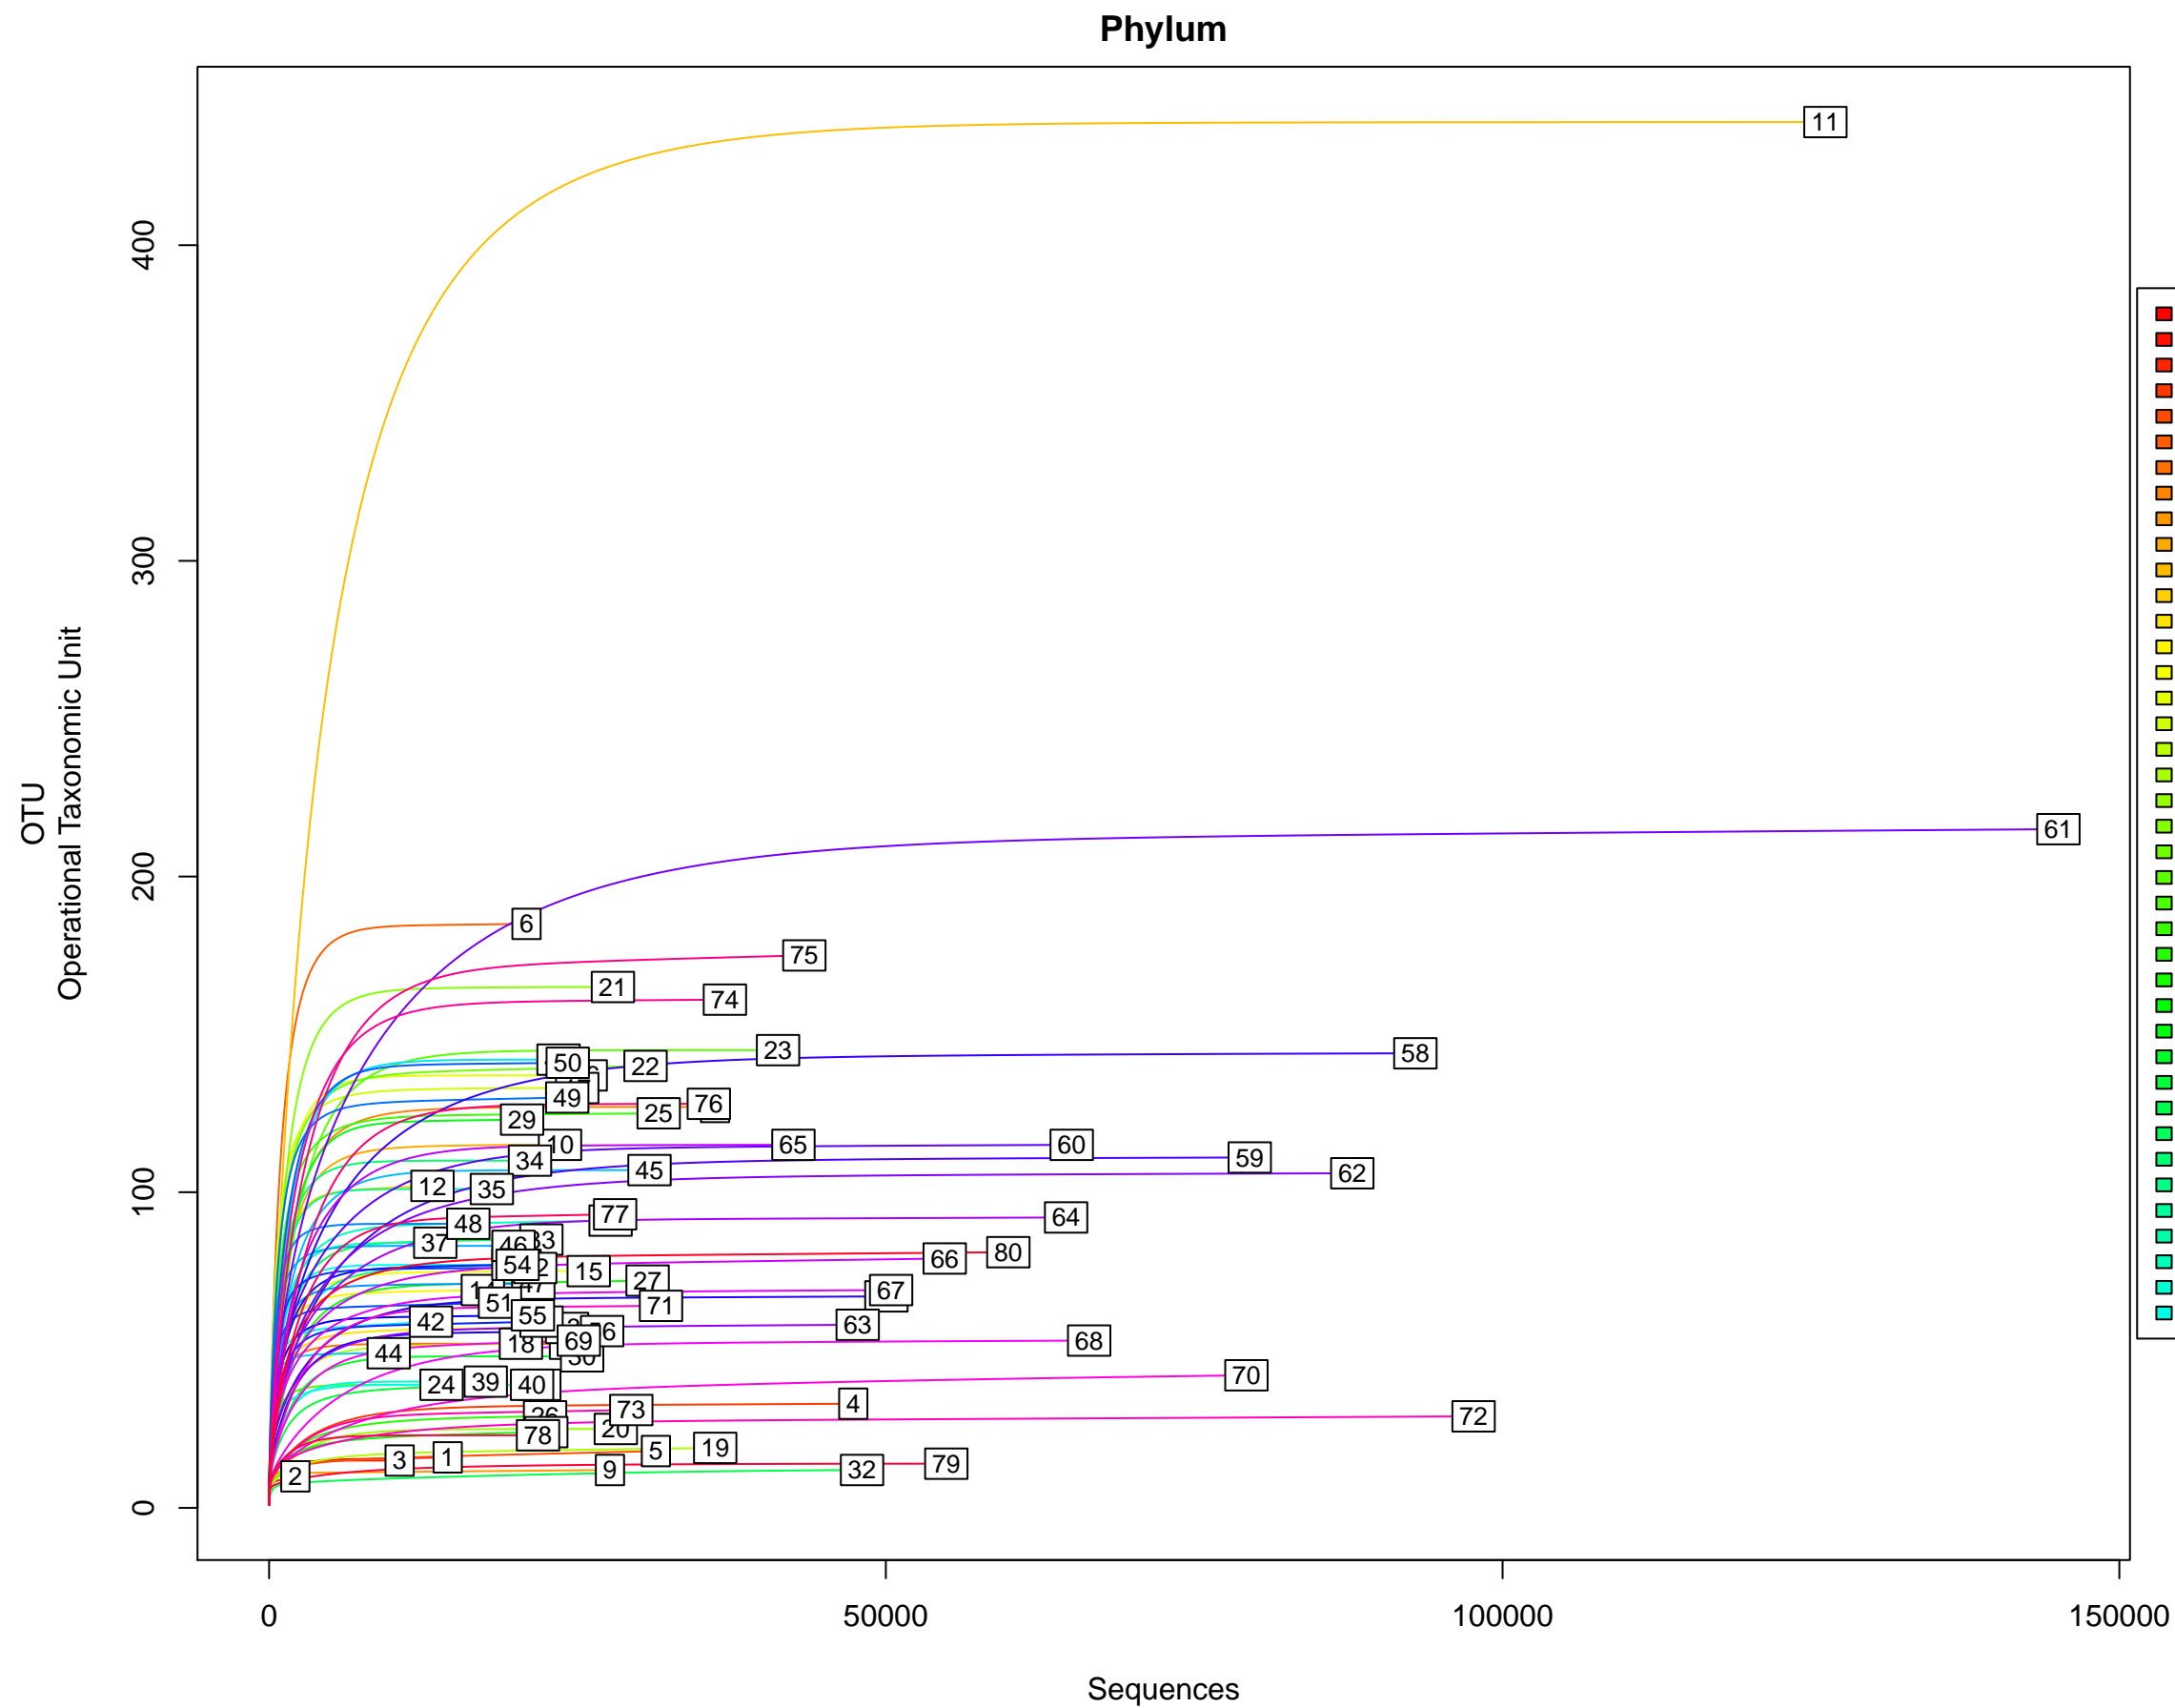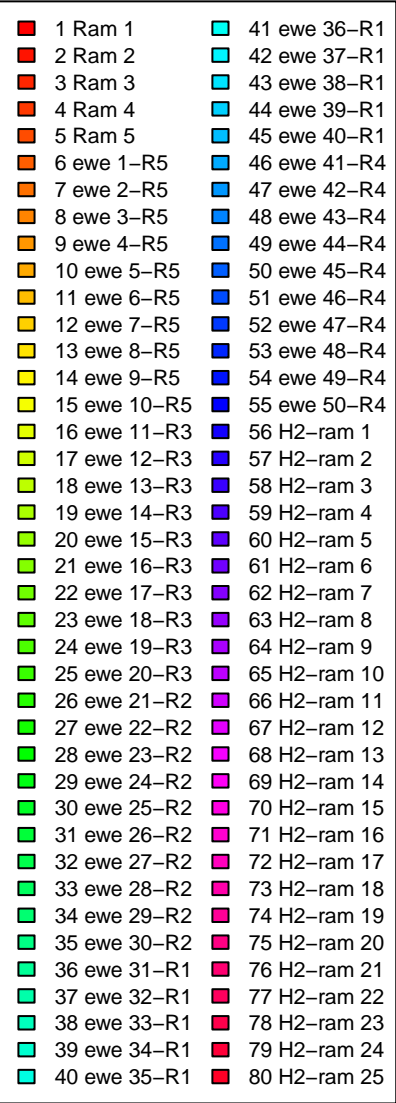

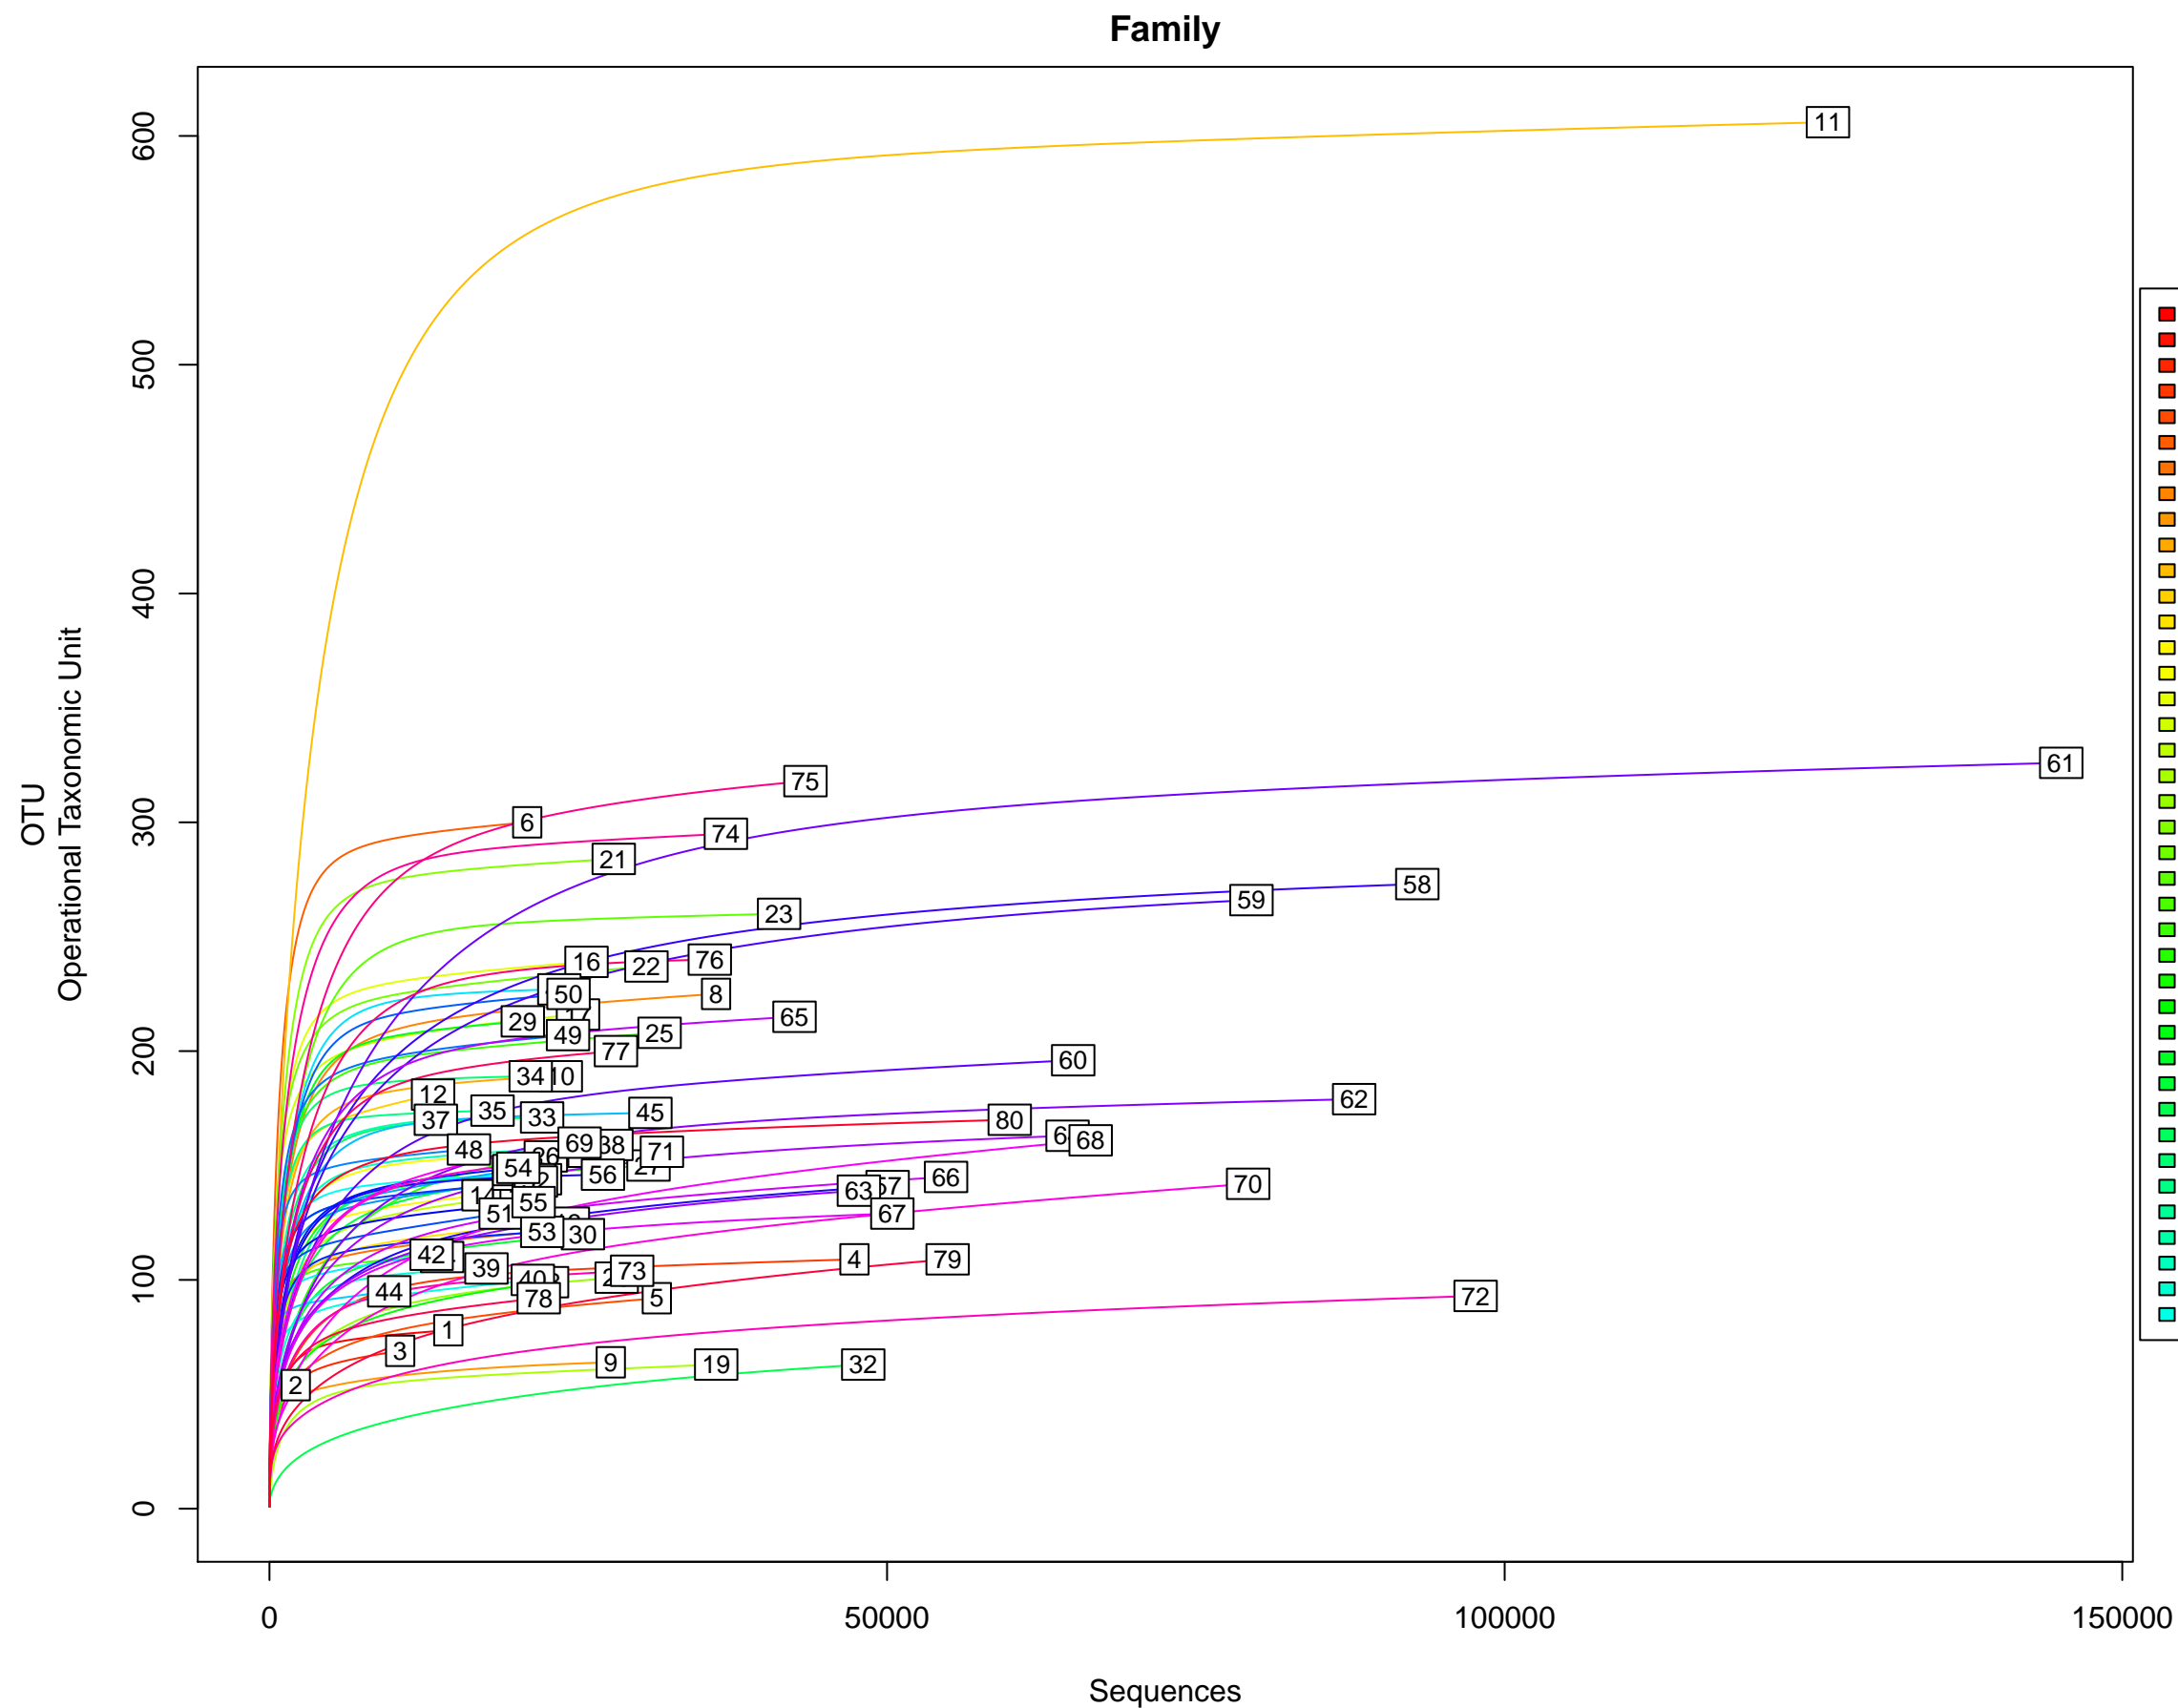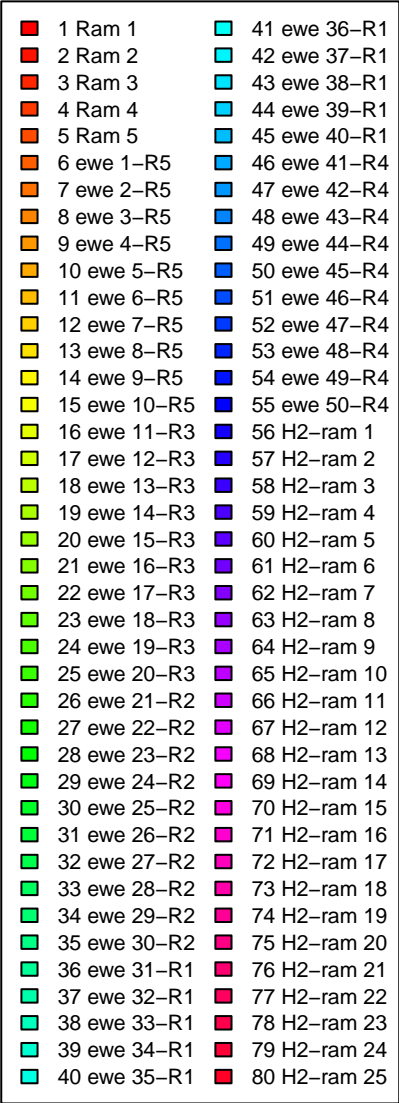

# Genera

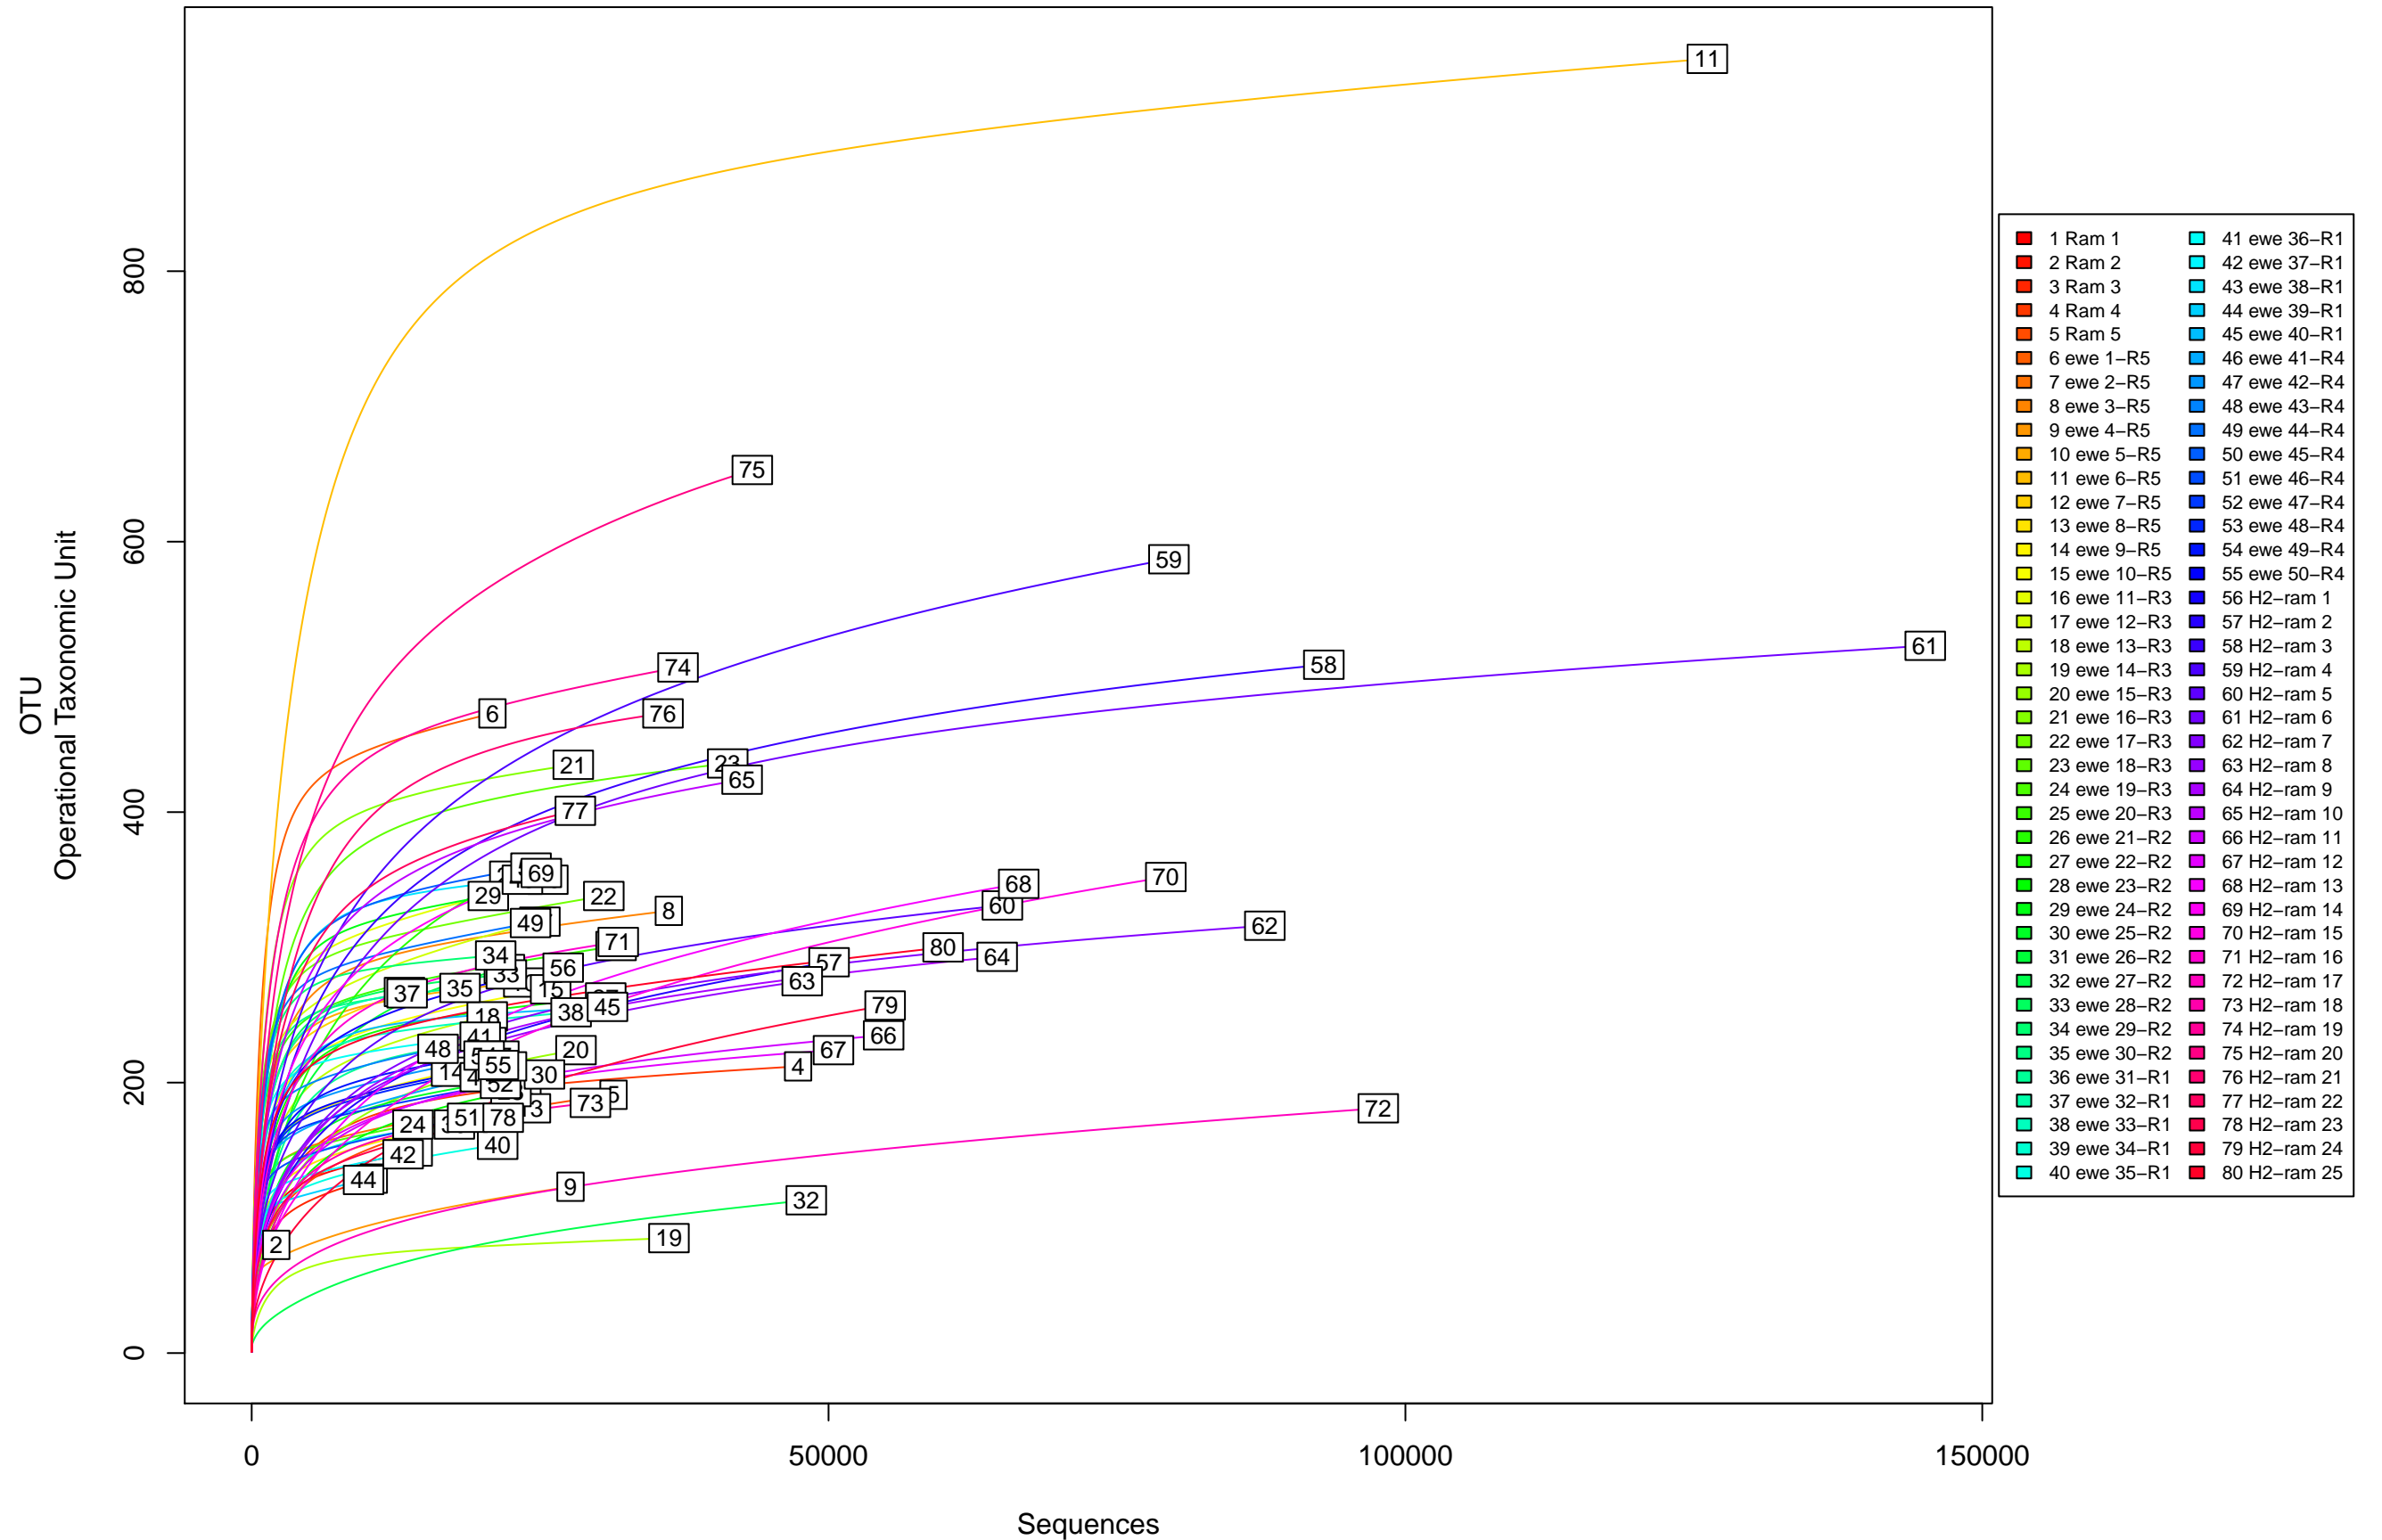

Supplement: s1 [file s1]

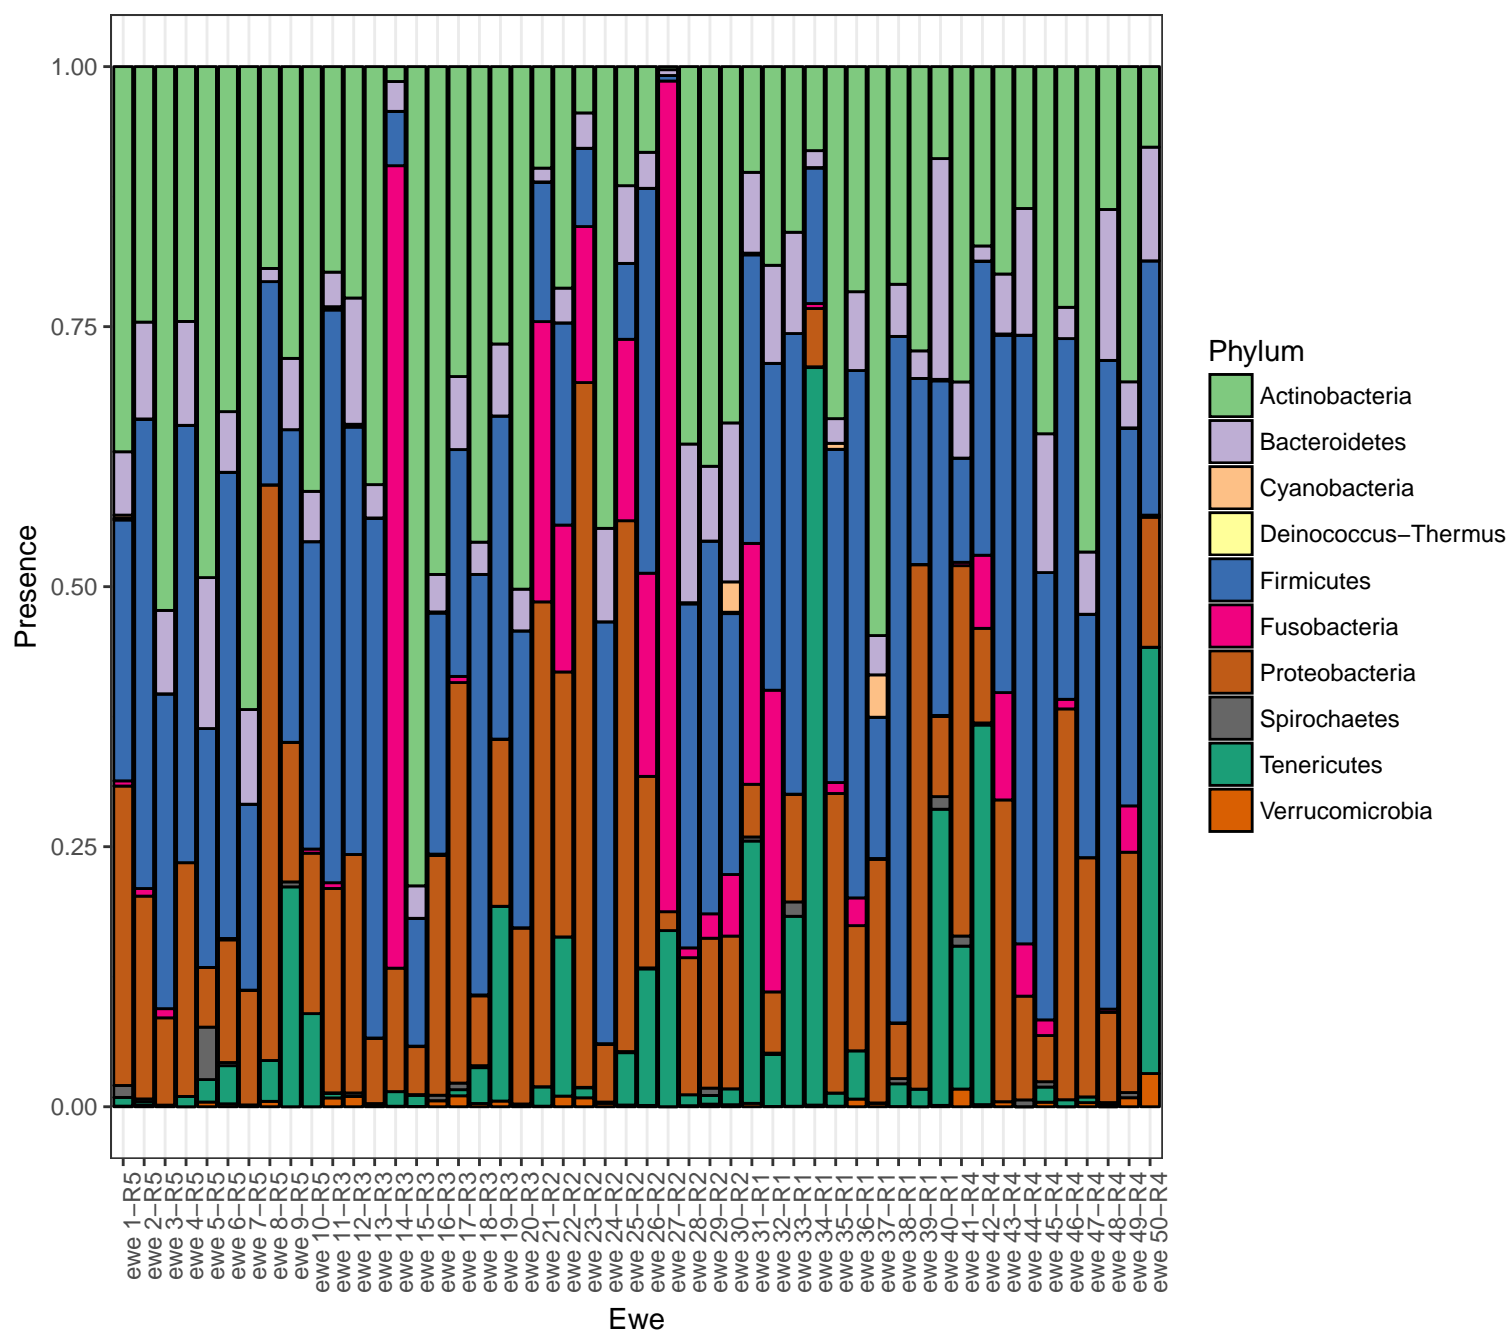

Supplement: s1 [file s1]

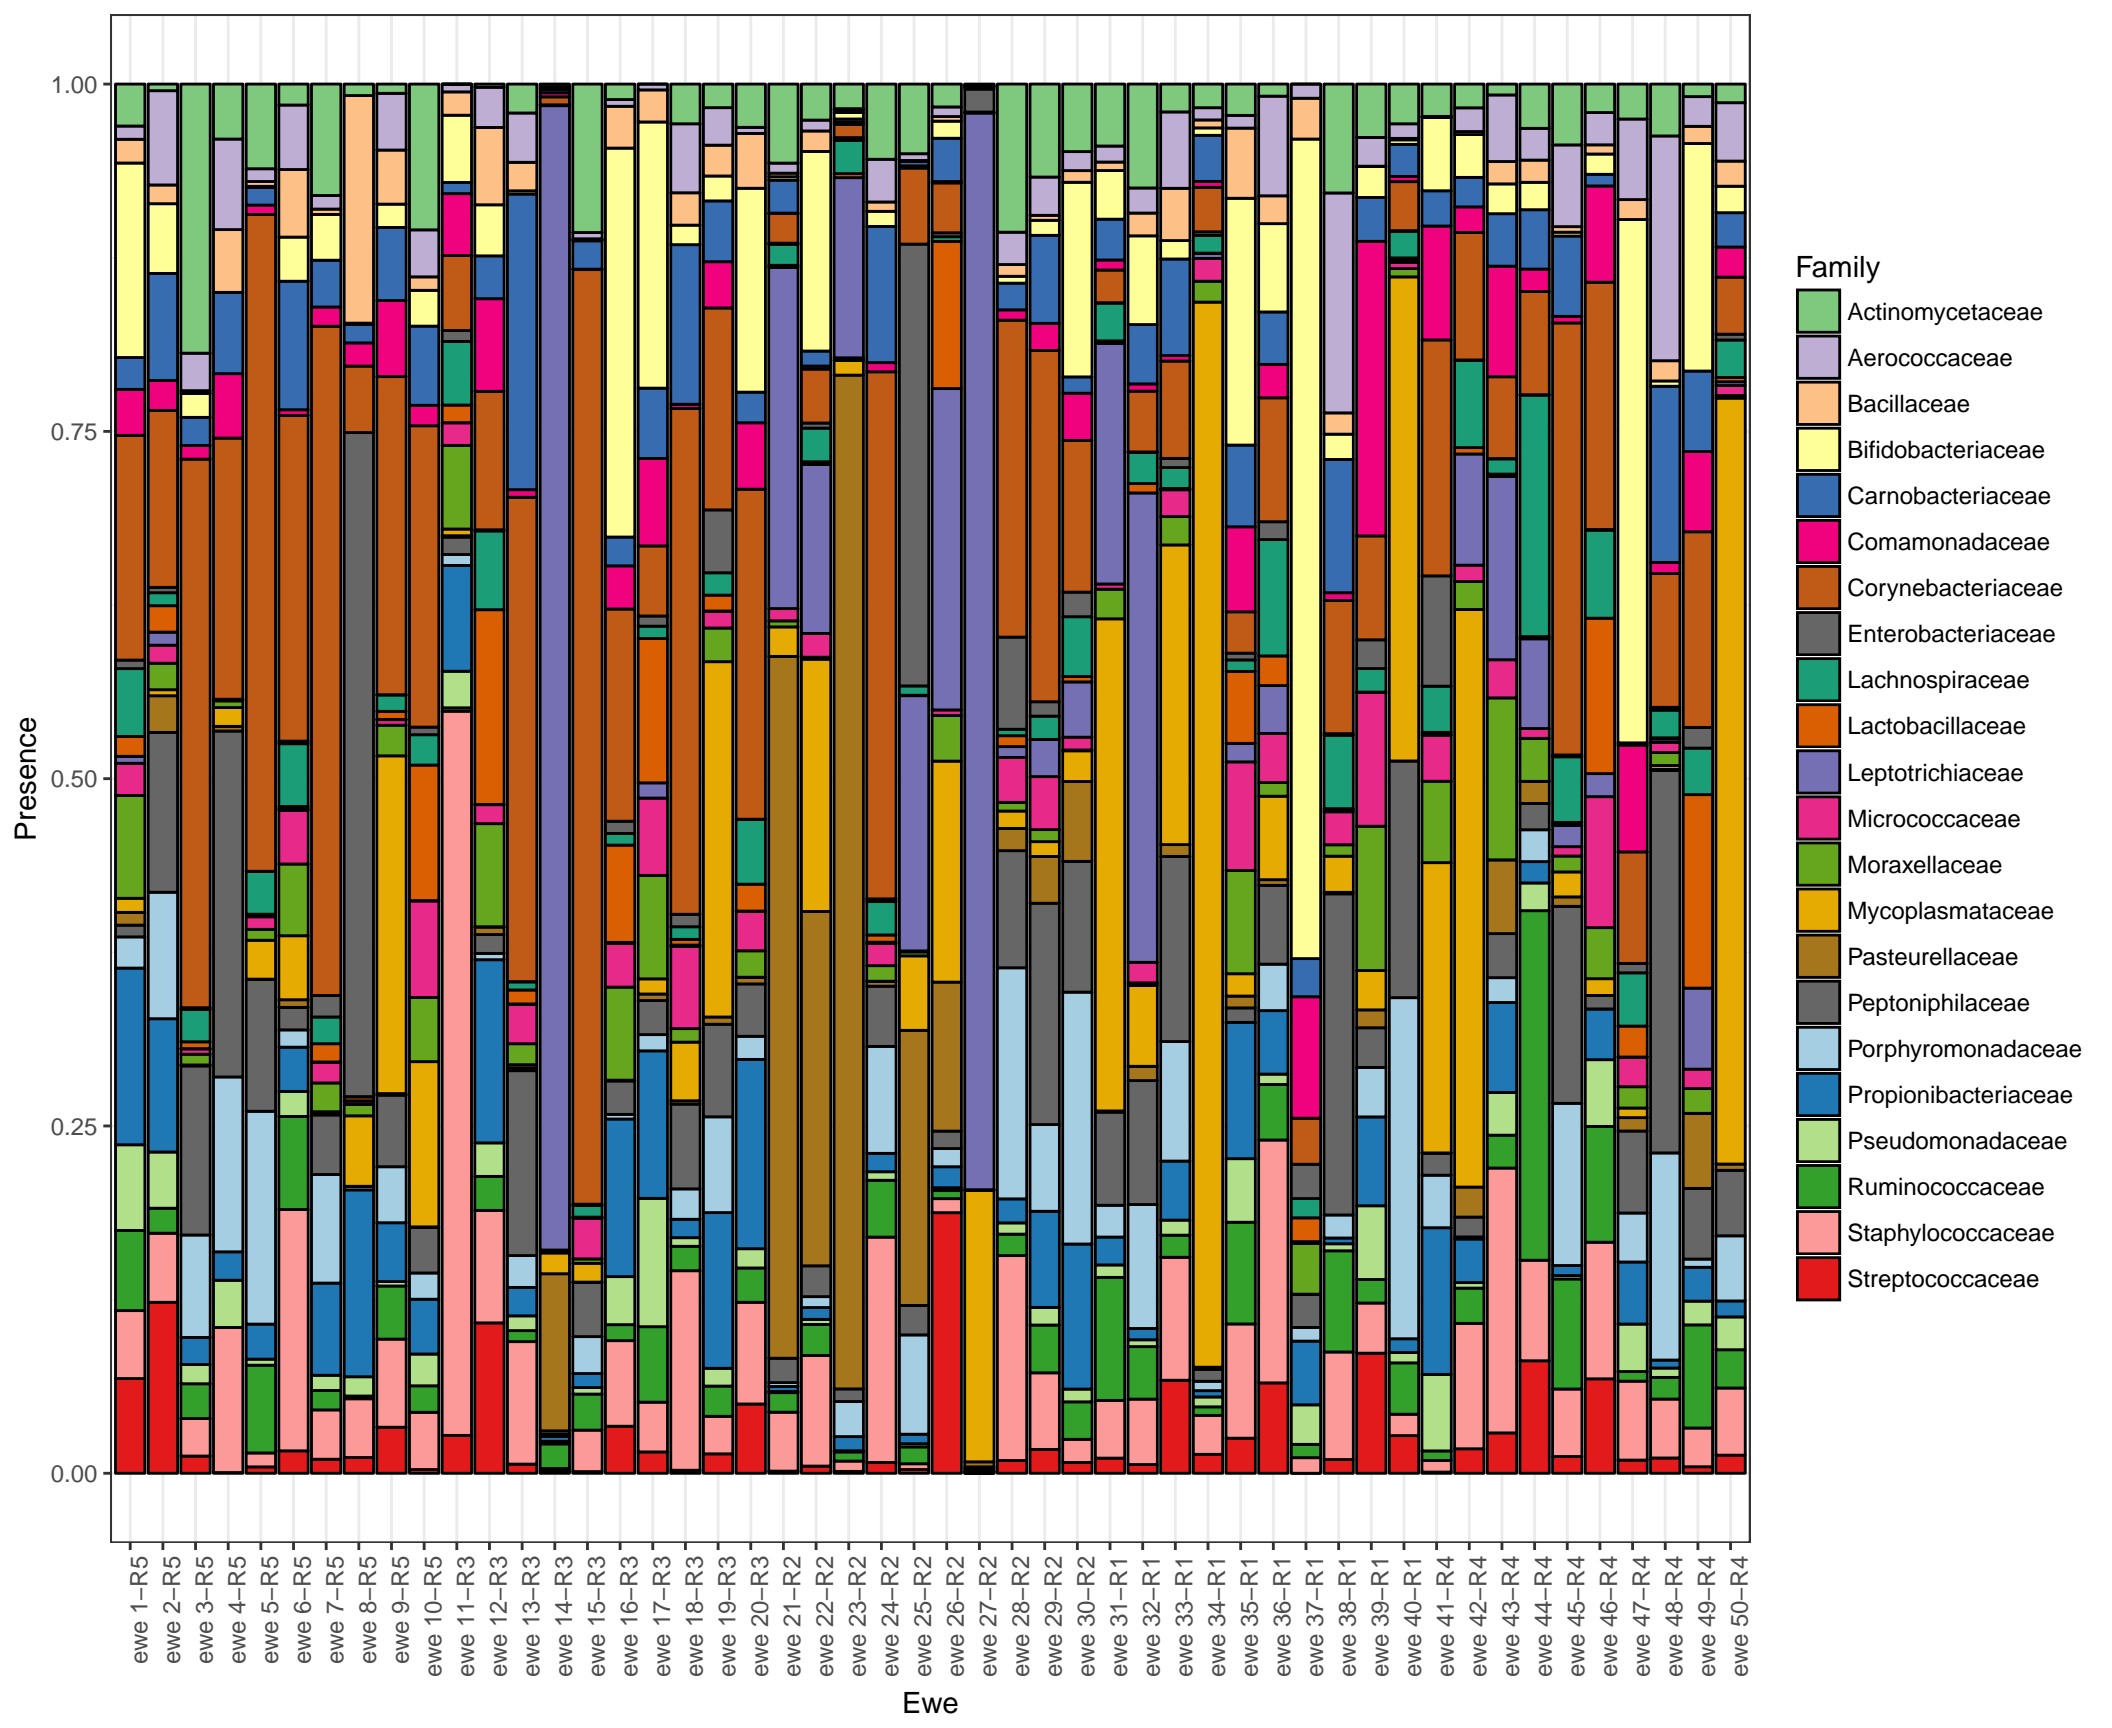

Supplement: s1 [file s1]

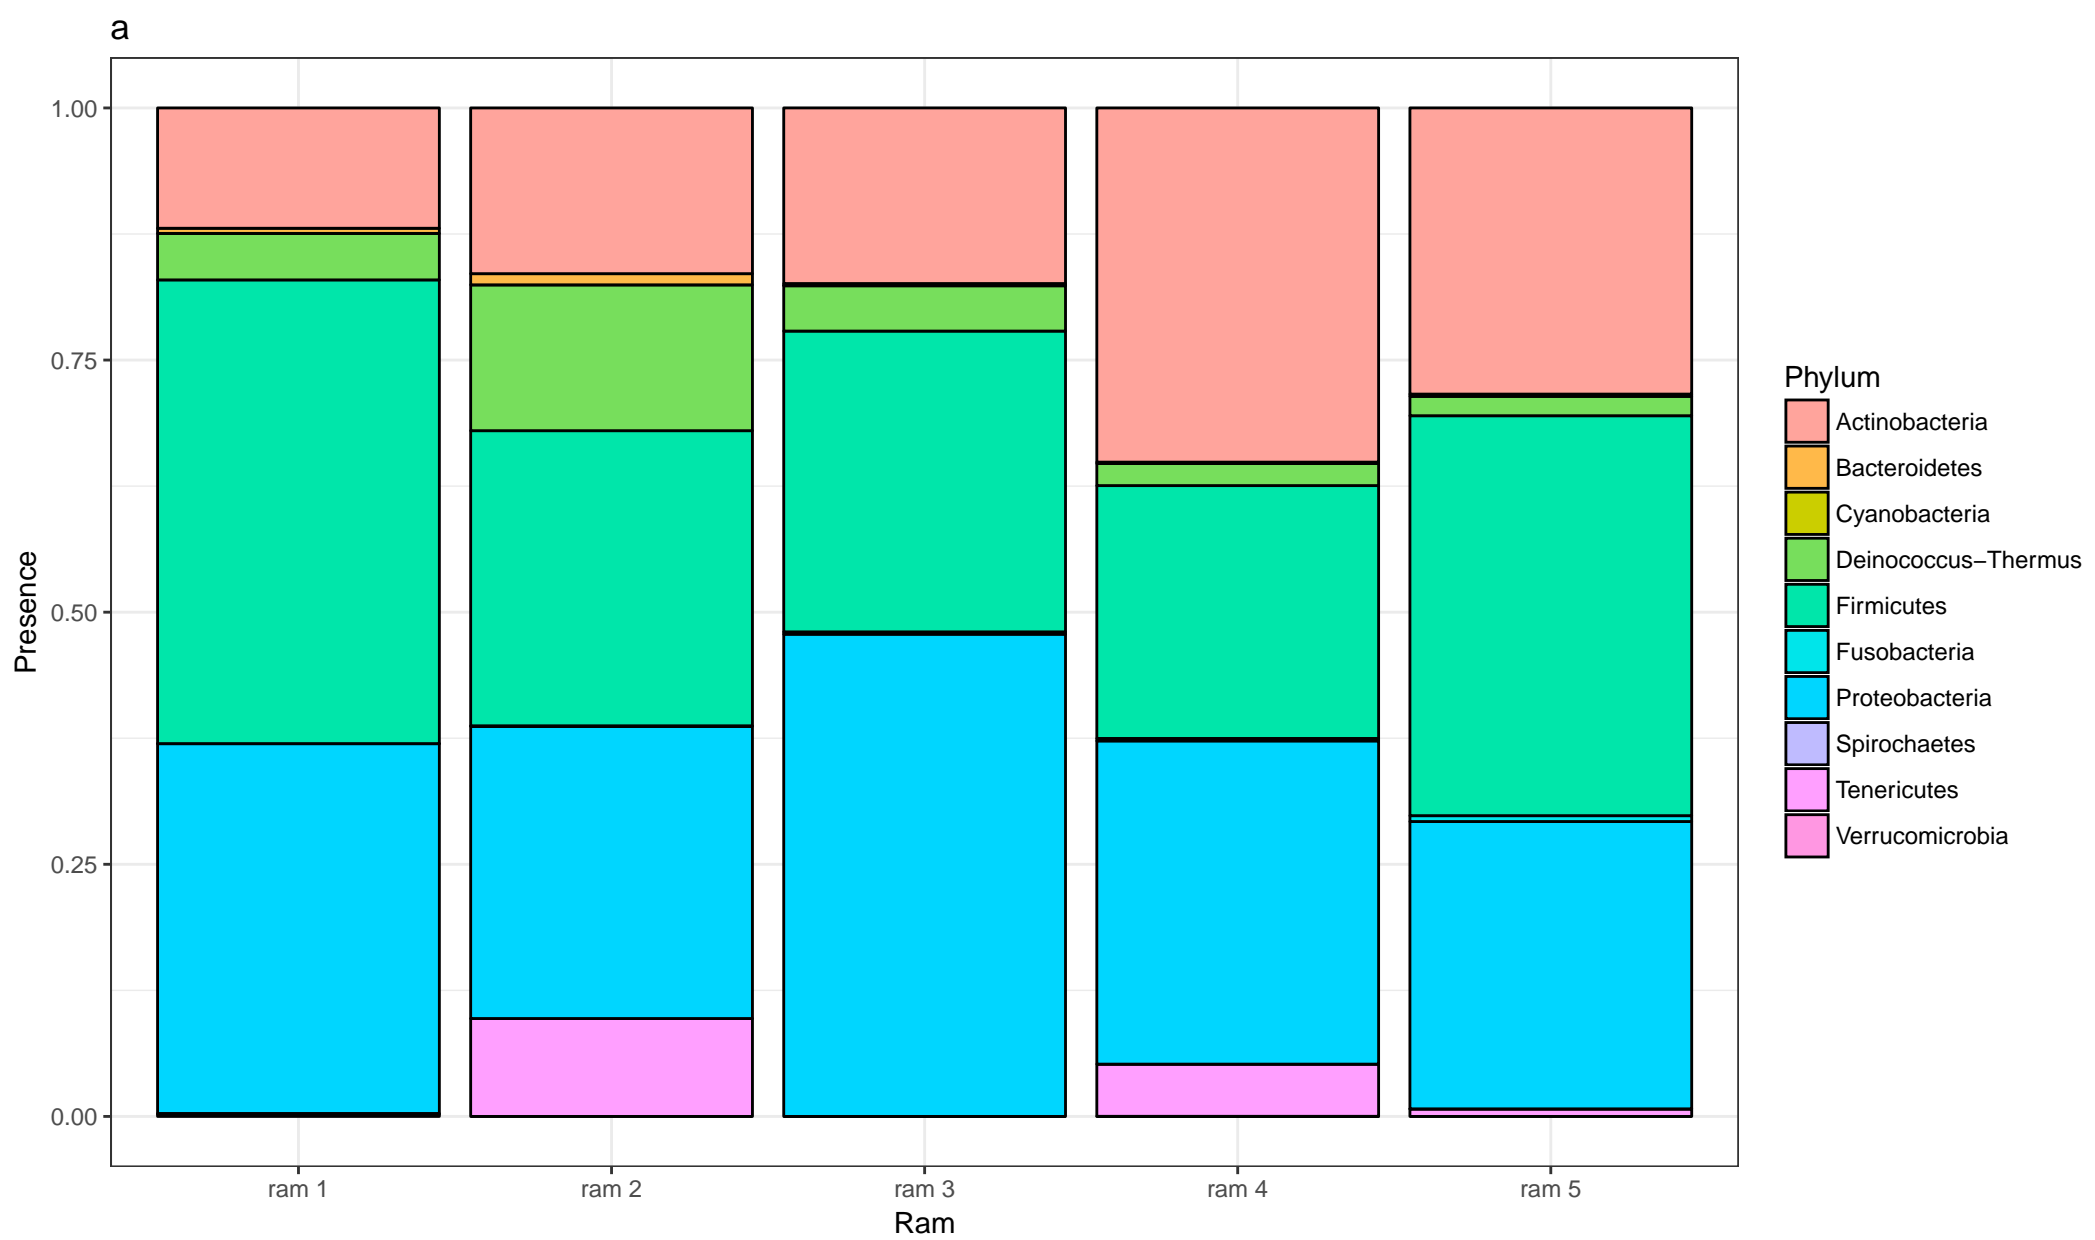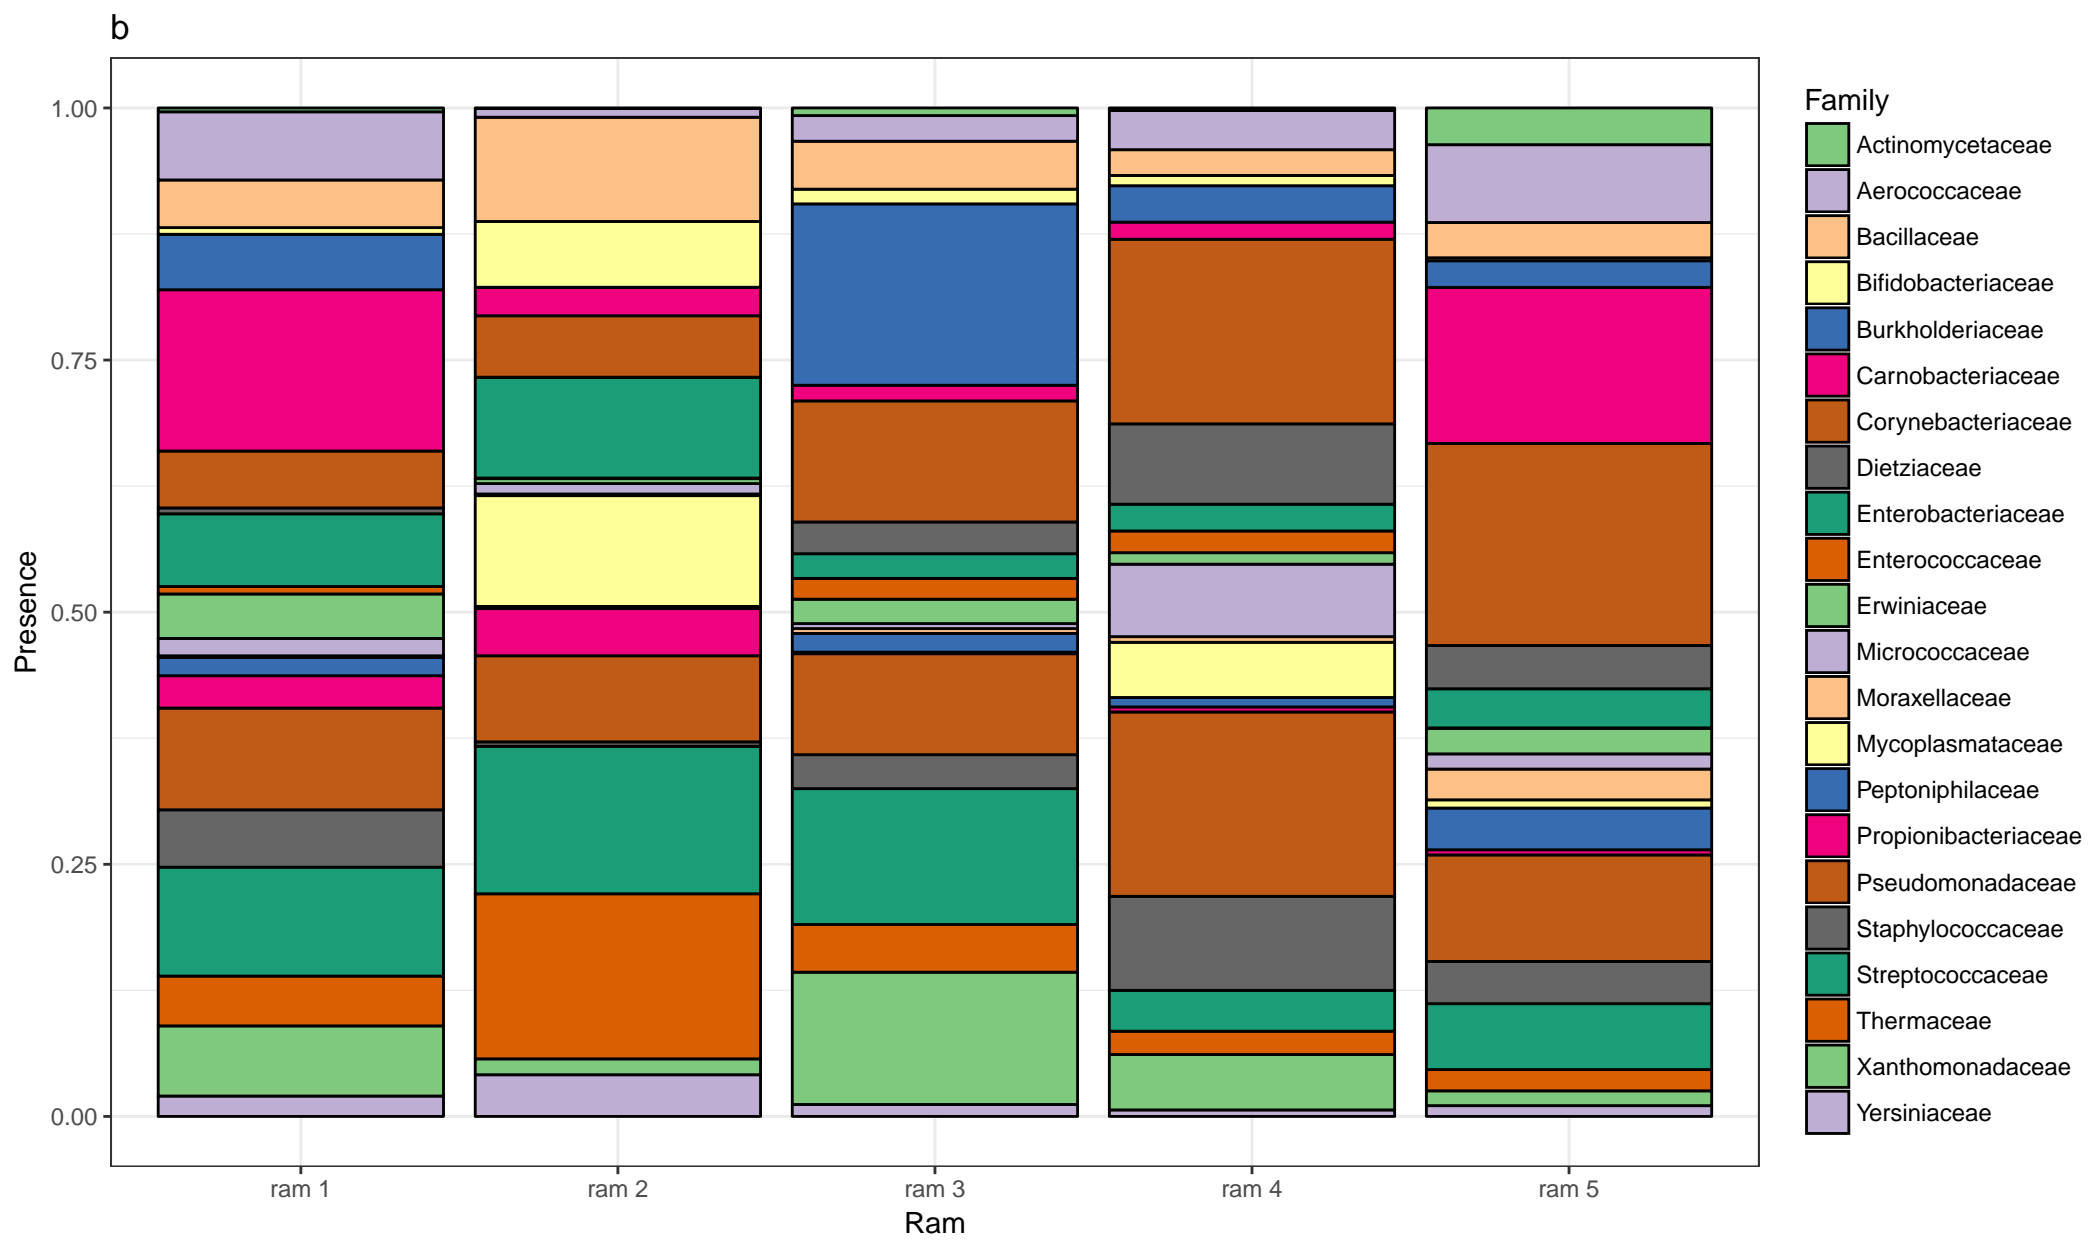

Supplement: s1 [file s1]

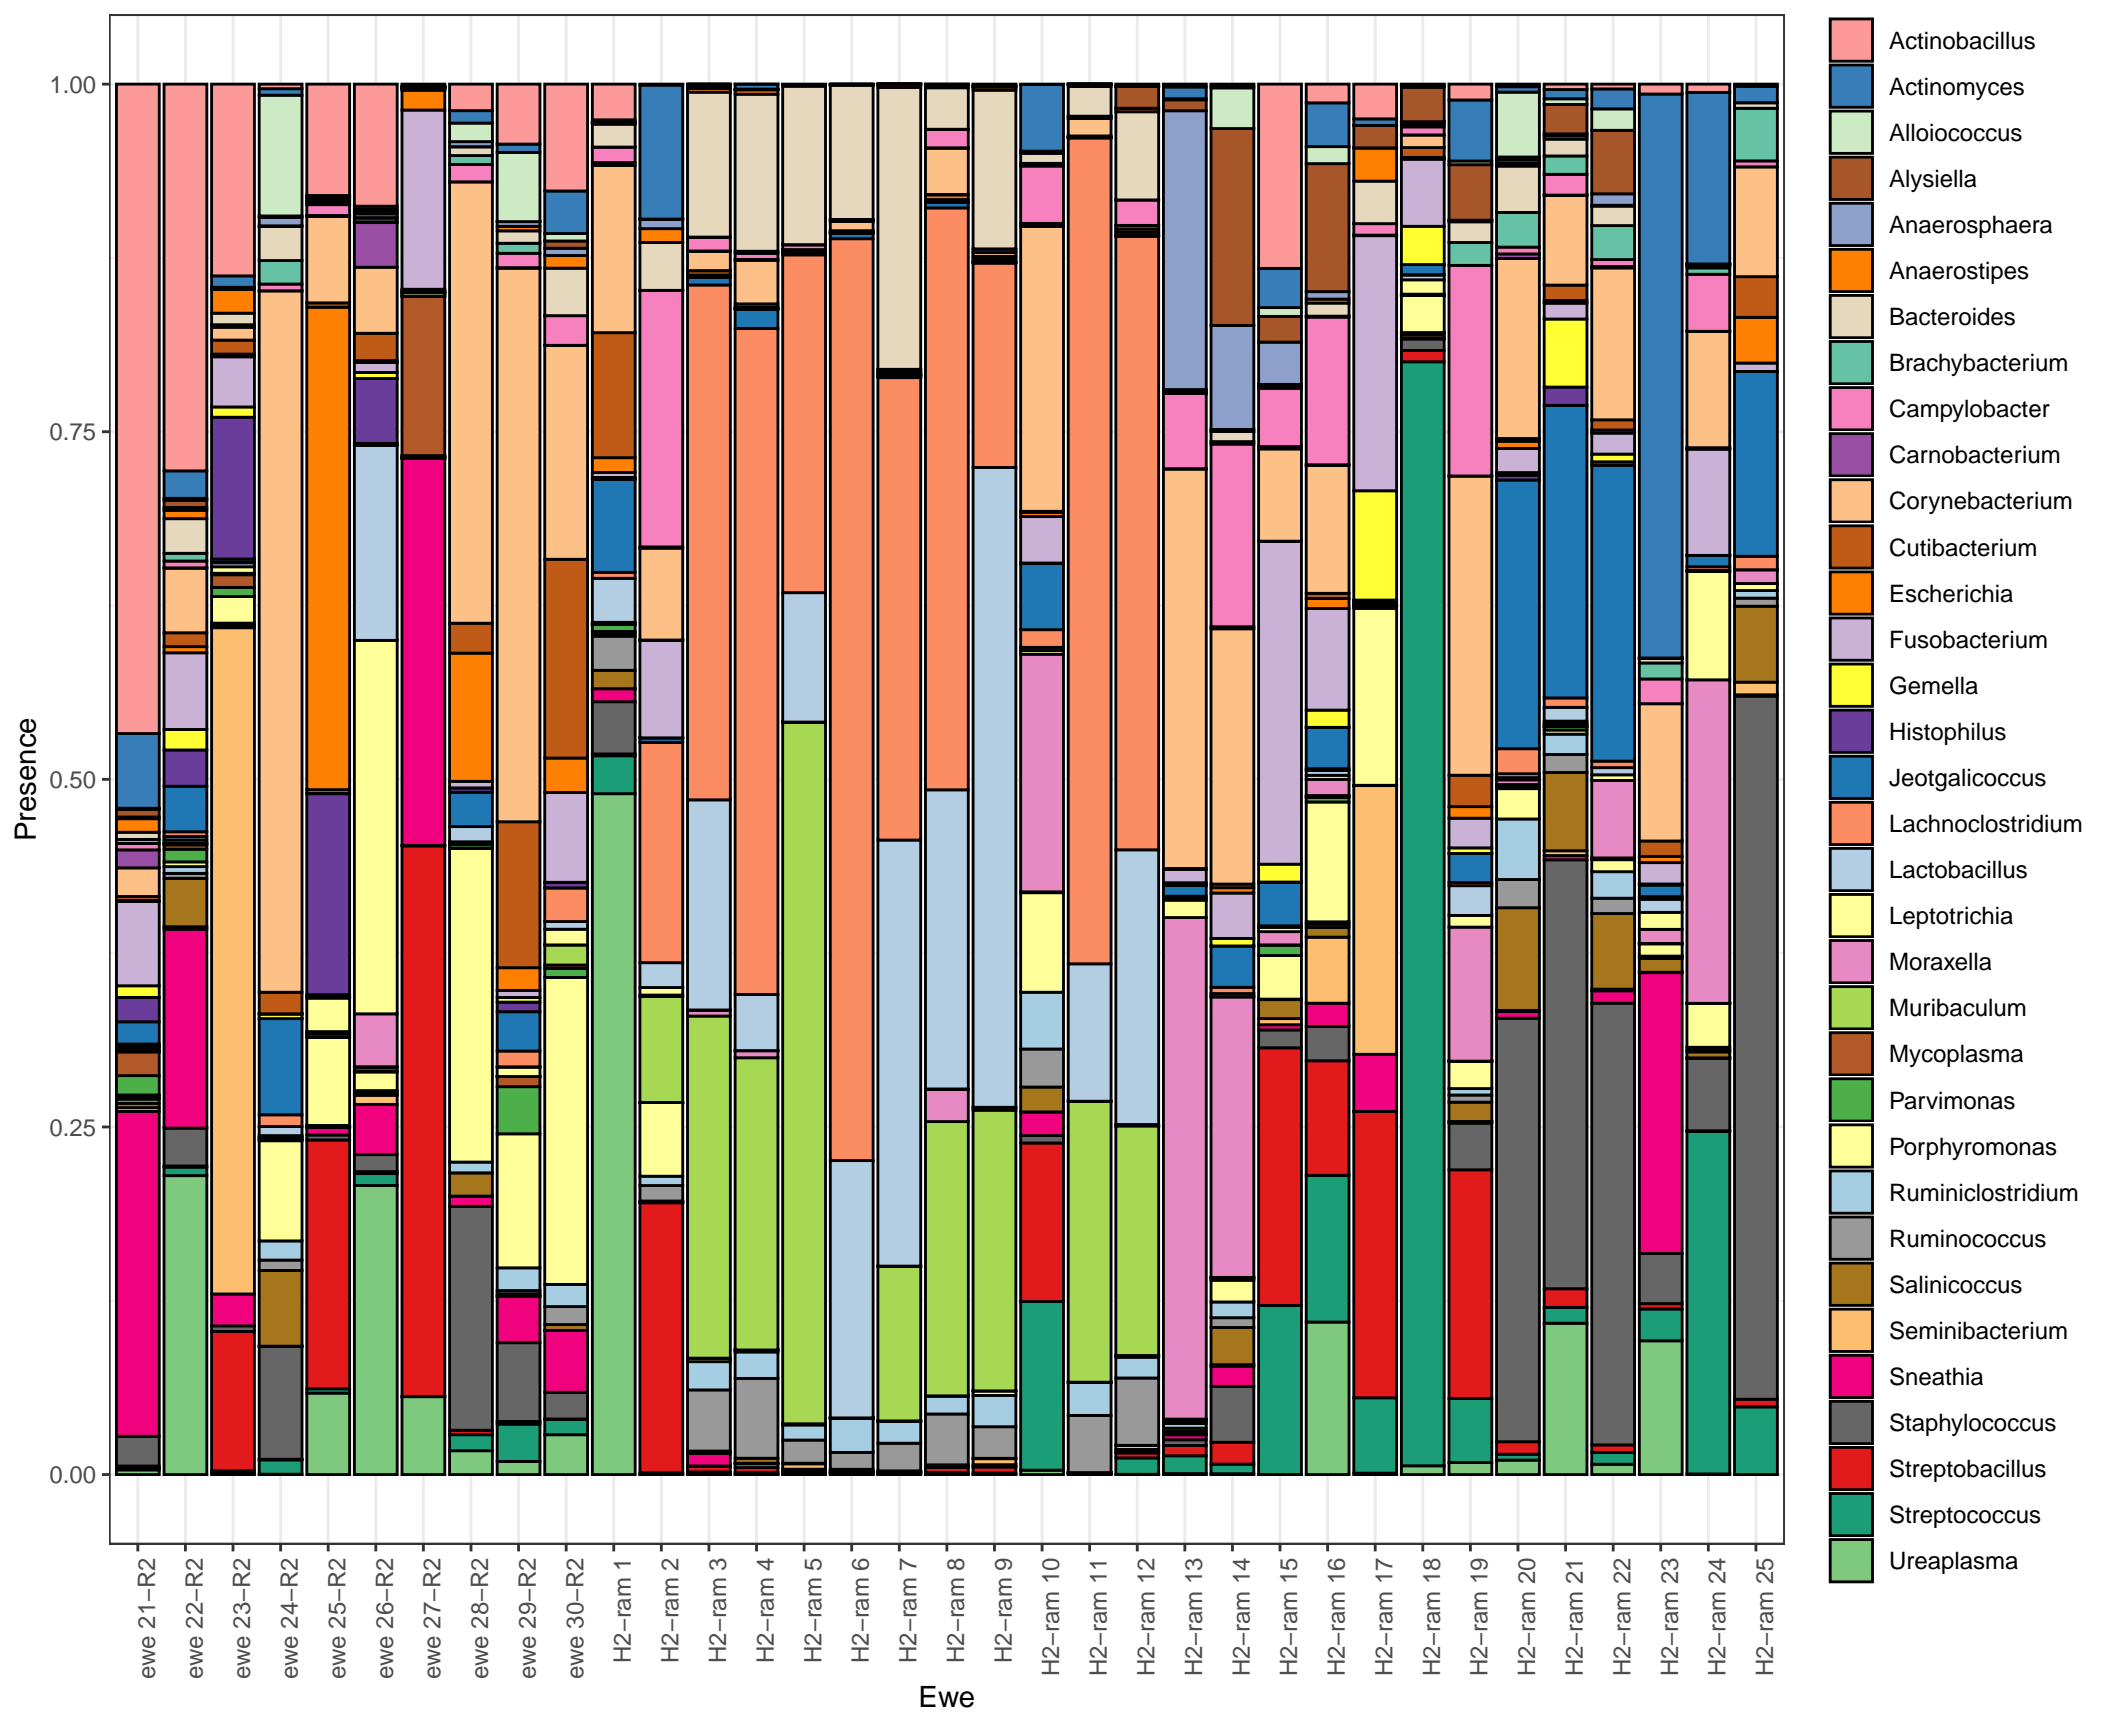

Supplement: s1 [file s1]
